# Supplementary material
Source: PubMed Central journal article supplement (PMC5809275)
Supplement: NIHMS928663-supplement-1.pdf [file NIHMS928663-supplement-1.pdf]

Figure S1. CD4<sup>+</sup> and CD8<sup>+</sup> T cells expand in the popliteal and inguinal lymph nodes of *B. burgdorferi* infected IL-10<sup>-/-</sup> mice

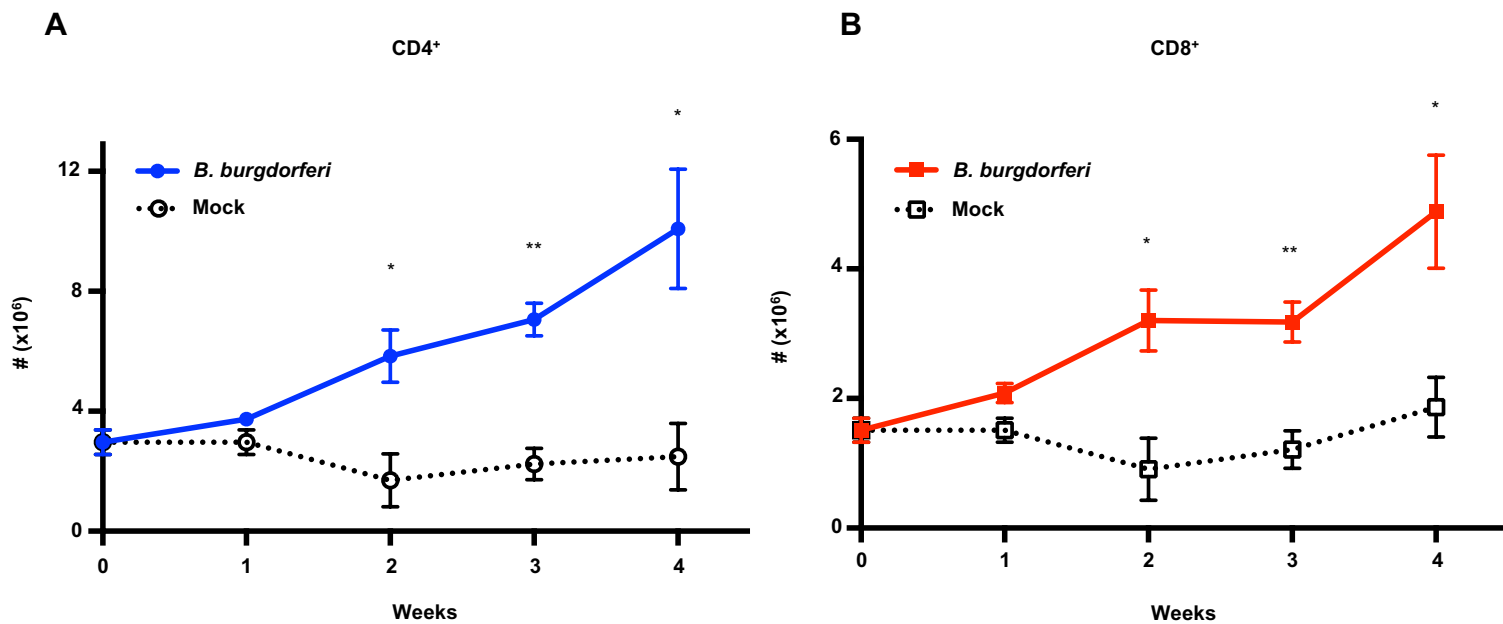

**Figure S1. CD4<sup>+</sup> and CD8<sup>+</sup> T cells expand in the popliteal and inguinal Lymph nodes of *B. burgdorferi* infected IL-10<sup>-/-</sup> mice**

Flow cytometry analysis of CD4<sup>+</sup> and CD8<sup>+</sup> T cells from the popliteal and inguinal lymph nodes of IL-10<sup>-/-</sup> mice infected with *B. burgdorferi* weekly throughout 4 weeks of infection. Error bars indicate the SEM (n≥3 per group). Statistically significant differences between groups by Student's t-test are indicated (\*p<0.05, \*\*p<0.01). Data are representative of two independent experiments.

**Figure S2. CD4<sup>+</sup> and CD8<sup>+</sup> T cells were efficiently depleted in the blood draining lymph nodes, and joints using neutralizing antibodies**

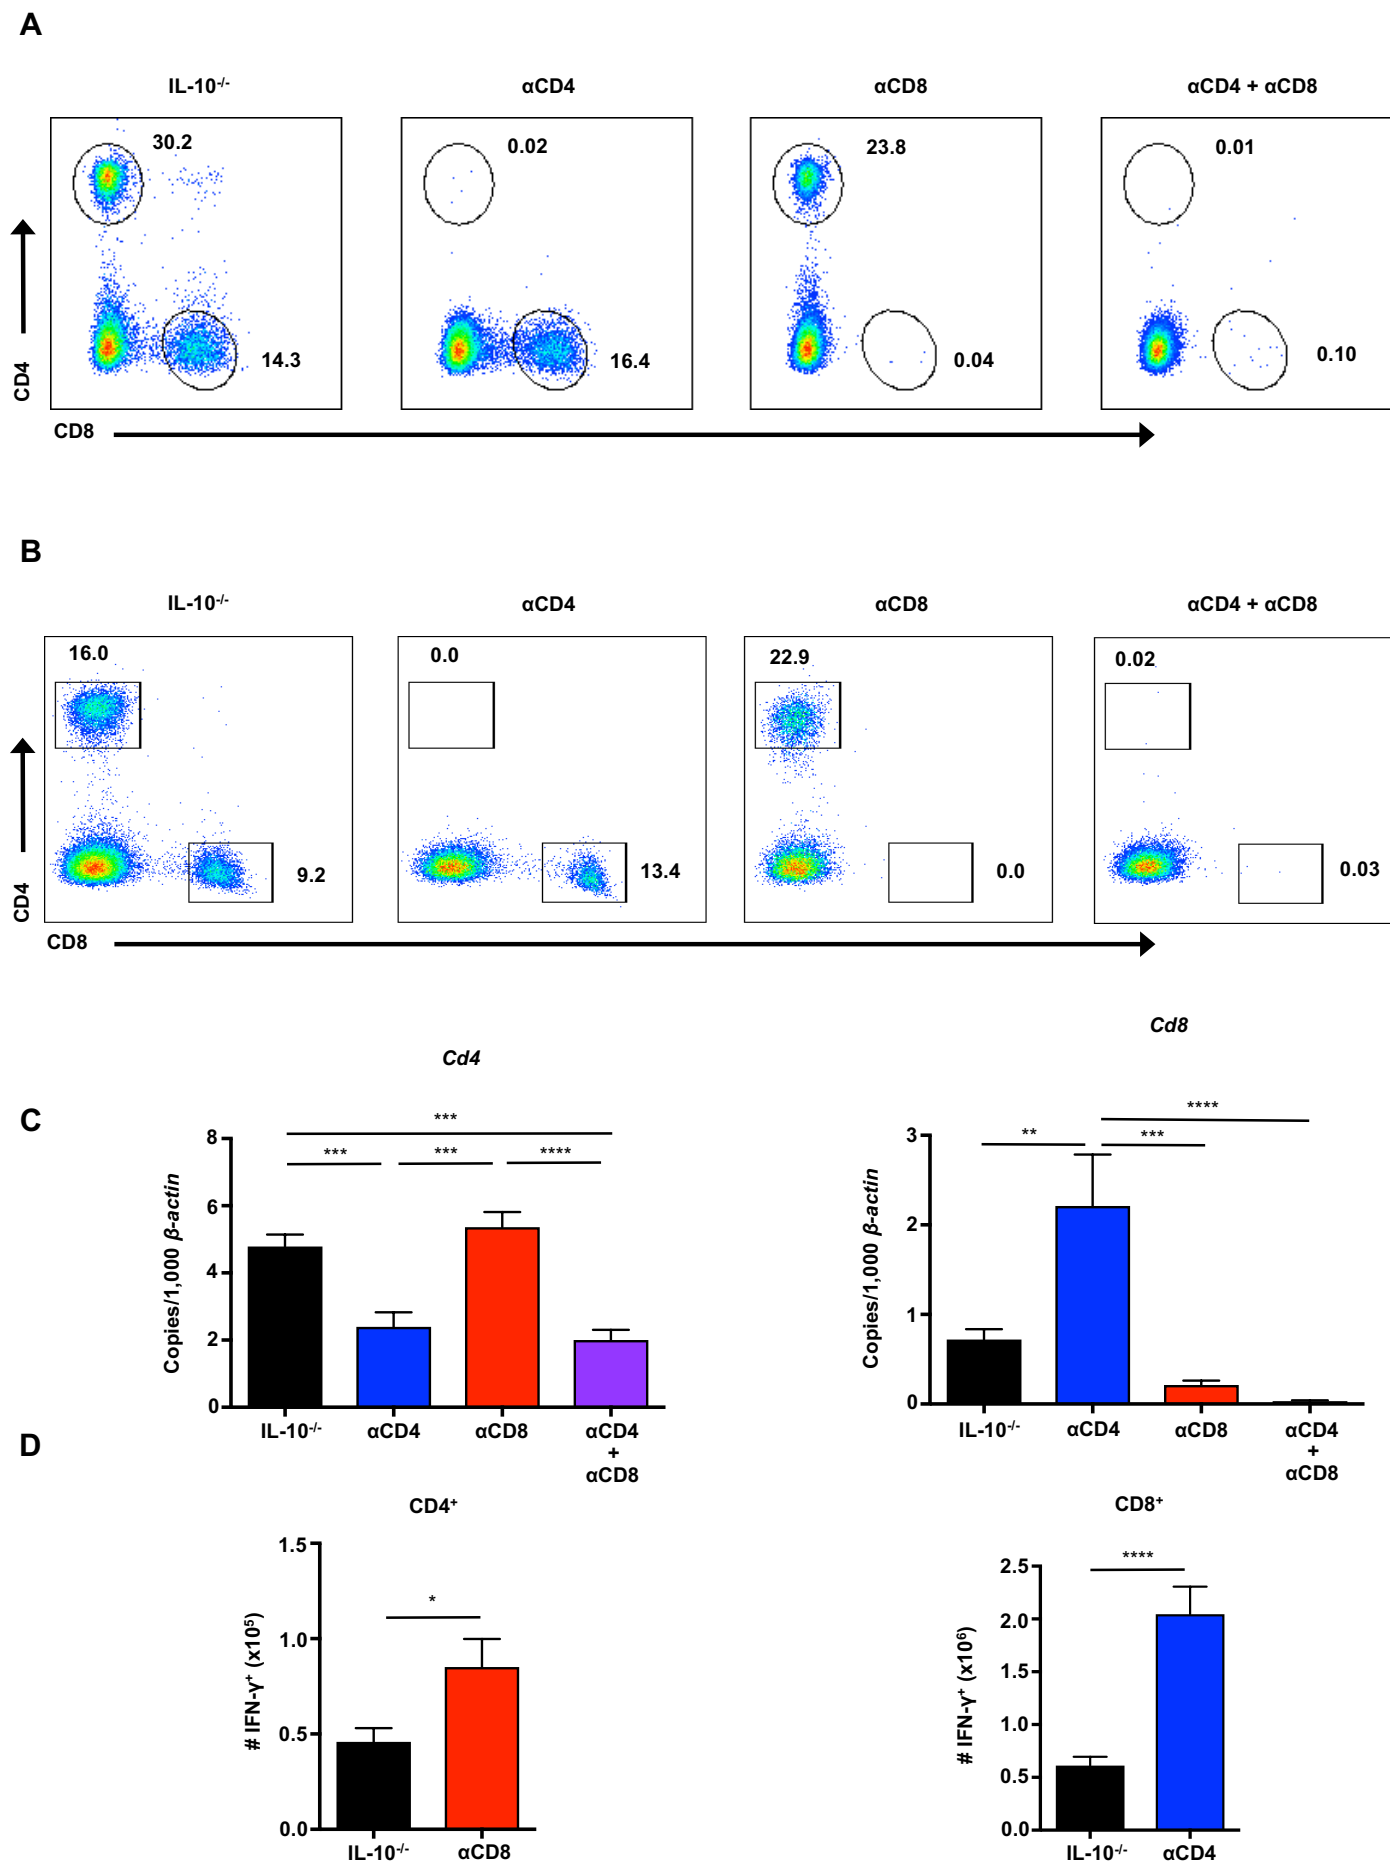

**Figure S2. CD4<sup>+</sup> and CD8<sup>+</sup> T cells were efficiently depleted in the blood, draining lymph nodes, and joints using neutralizing antibodies**

IL-10<sup>-/-</sup> mice were infected with *B. burgdorferi* for 4 weeks, and treated with isotype control antibody, anti-CD4, anti-CD8, or both anti-CD4 and anti-CD8 (**Methods**). (A) Blood was collected 4 days after the first antibody injection and analyzed by flow cytometry for the presence of CD4<sup>+</sup> and CD8<sup>+</sup> T cells. (B) Popliteal and inguinal lymph nodes were obtained 4 weeks post infection and analyzed by flow cytometry for the presence of CD4<sup>+</sup> and CD8<sup>+</sup> T cells. (C) Joints were collected 4 weeks post-infected and analyzed by qRT-PCR for the presence of *CD4* and *CD8* transcripts. (D) Popliteal and inguinal lymph nodes were analyzed 4 weeks post infection for CD4<sup>+</sup>IFN $\gamma$ <sup>+</sup> and CD8<sup>+</sup>IFN $\gamma$ <sup>+</sup> T cells by flow cytometry. (C) Statistically significant differences between groups by ANOVA followed by Bonferroni's post-hoc test are indicated (\*p<0.05, \*\*p<0.01, \*\*\*p<0.001, \*\*\*\*p<0.0001). (D) Statistically significant differences between groups by Student's t-test are indicated (\*p<0.05, \*\*\*\*p<0.0001).

**Figure S3. SMARTA/IL-10<sup>-/-</sup> arthritis development is partially dependent on IFN- $\gamma$**

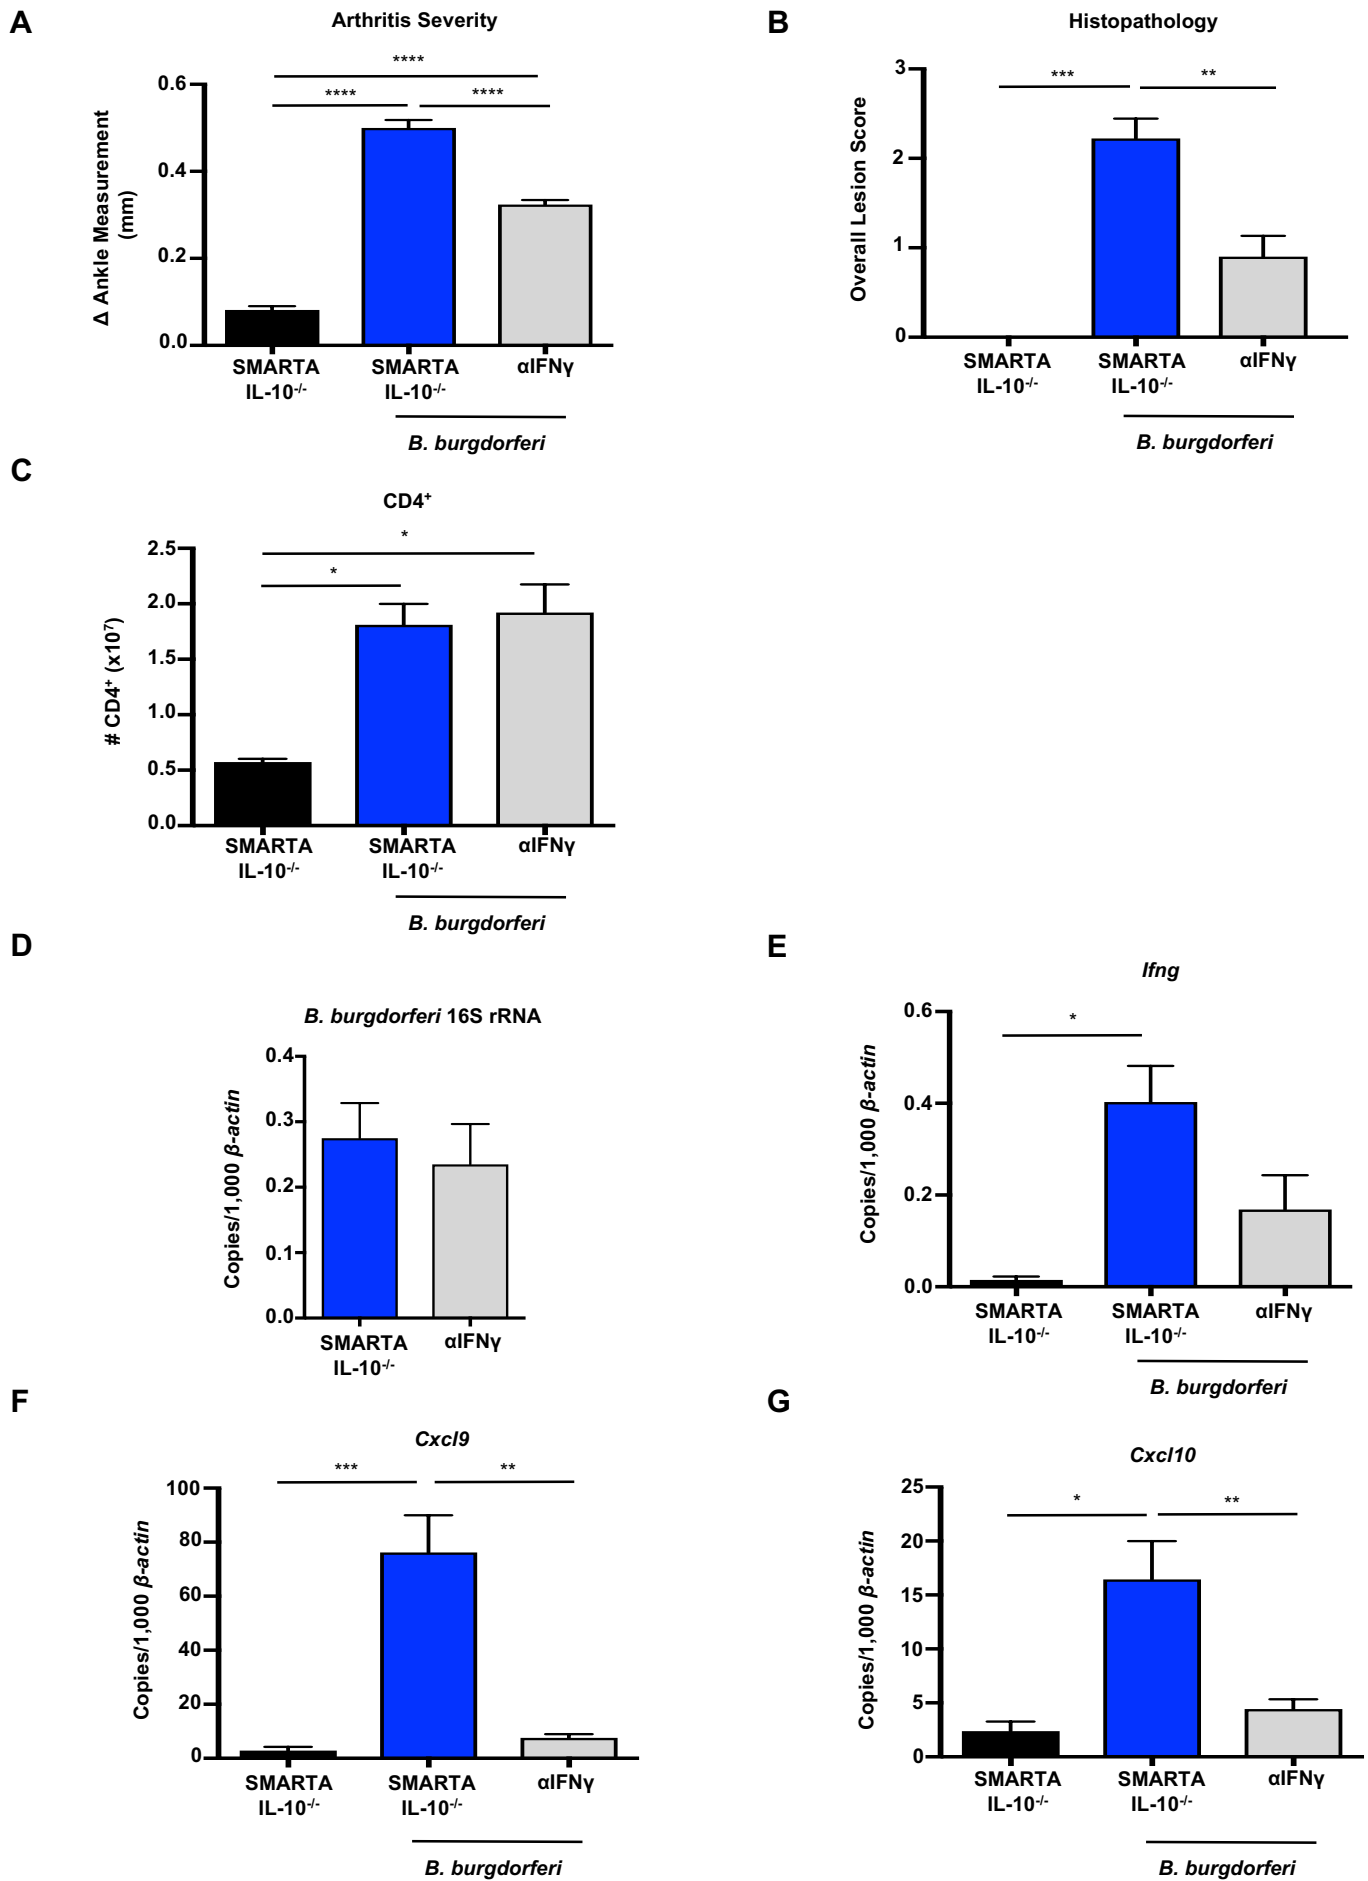

**Figure S3. SMARTA/IL-10<sup>-/-</sup> arthritis development is partially dependent on IFN- $\gamma$**

CD4<sup>+</sup> TCR transgenic SMARTA/IL-10<sup>-/-</sup> mice were infected with *B. burgdorferi* for 4 weeks. Mice were injected with an isotype control or anti-IFN- $\gamma$  over the course of infection. (A) Measurements of rear ankles of mice were taken before infection and 4 weeks post-infection, and change in ankle measurement is shown. (B) The most swollen ankle was assessed by histopathologic evaluation in a blind fashion. Scores 0-5, with 5 being most severe, were assigned to each sample. (C) The total number of CD4<sup>+</sup> were quantified from the popliteal and inguinal lymph nodes using flow cytometry. (D-G) Quantification of *B. burgdorferi*-specific *16S rRNA*, *Ifng*, *Cxcl9*, and *Cxcl10* was normalized to 1,000  $\beta$ -actin in the joint using qRT-PCR. Error bars indicate the SEM (n = 10 per group). Statistically significant differences between groups by ANOVA followed by Bonferroni's post-hoc test are indicated (\*p<0.05, \*\*p<0.01, \*\*\*p<0.001 \*\*\*\*p<0.0001).

Figure S4. TLR expression on CD4<sup>+</sup> and CD8<sup>+</sup> T cells following *B. burgdorferi* infection

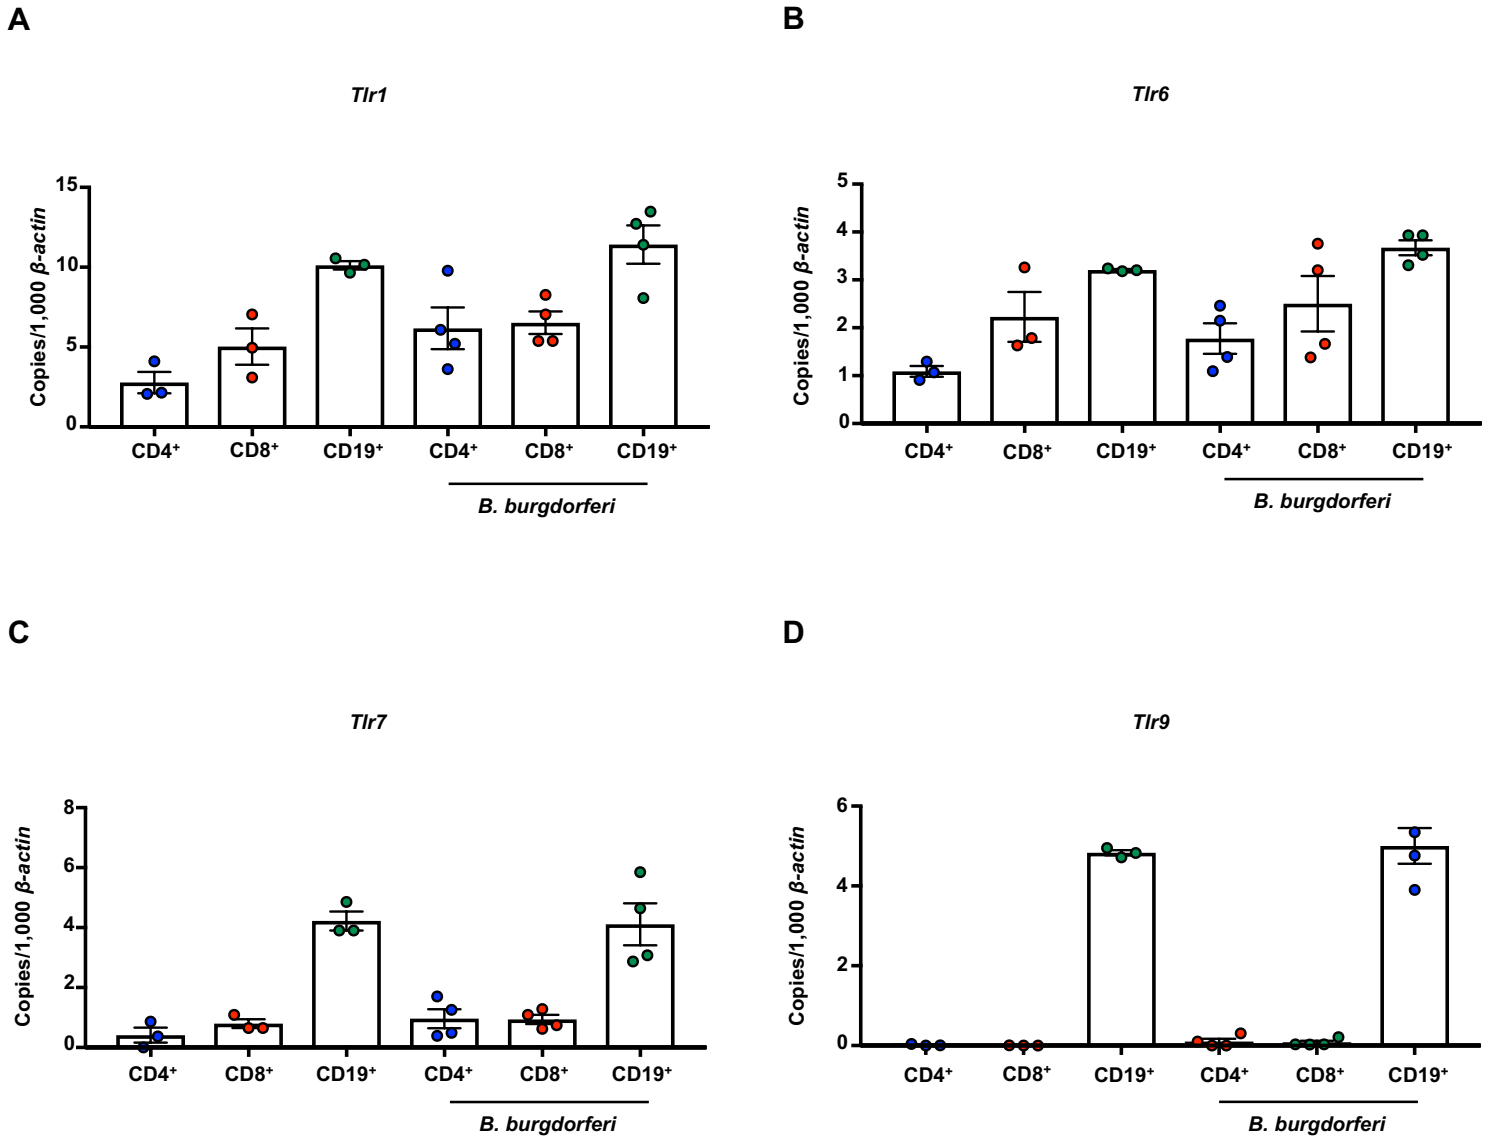

**Figure S4. TLR expression on CD4<sup>+</sup> and CD8<sup>+</sup> T cells following *B. burgdorferi* infection**

Expression of TLR's on CD4<sup>+</sup> and CD8<sup>+</sup> T cells from the popliteal and inguinal lymph nodes of mice infected with *B. burgdorferi* for 4 weeks. CD3<sup>+</sup>CD4<sup>+</sup>, CD3<sup>+</sup>CD8<sup>+</sup>, and CD19<sup>+</sup> cells were sorted out from popliteal and inguinal lymph nodes of IL-10<sup>-/-</sup> mice using FACS sorting (BD FACSAria). (A-D) Transcripts for *Tlr1*, *Tlr5*, *Tlr6*, and *Tlr9* were measured by qRT-PCR, normalized to 1,000  $\beta$ -actin. Error bars indicate the SEM (n $\geq$ 3 per group Error bars indicate the SEM (n $\geq$ 5 per group). Statistically significant differences between groups by Student's t-test are indicated (\*\*p<0.01, \*\*\*p<0.001). Data are representative of two independent experiments.
